# Supplementary material
Source: PubMed Central journal article supplement (PMC3094111)
Supplement: emboj201149s2.pdf [file emboj201149s2.pdf]

**Original scans for figure 7e (Upper western-blot)**

NO 1

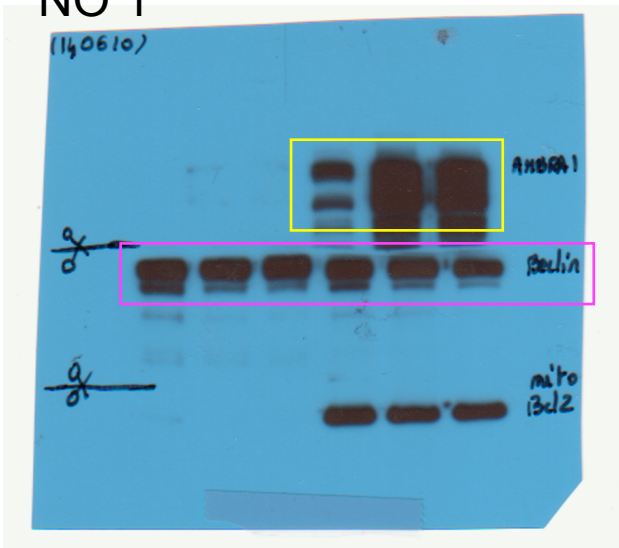

NO 2

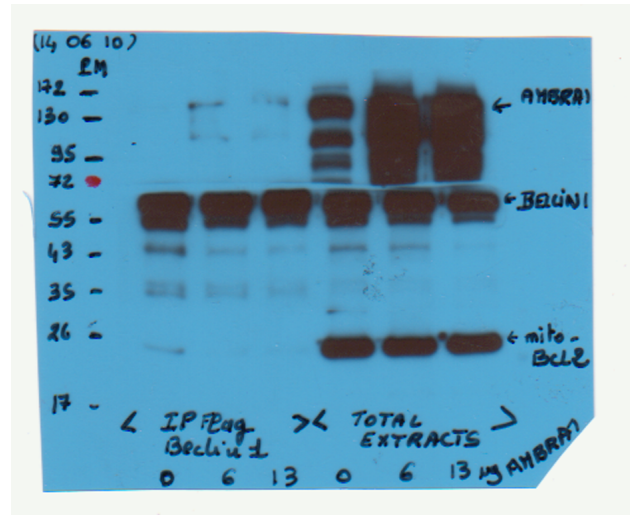

NO 3

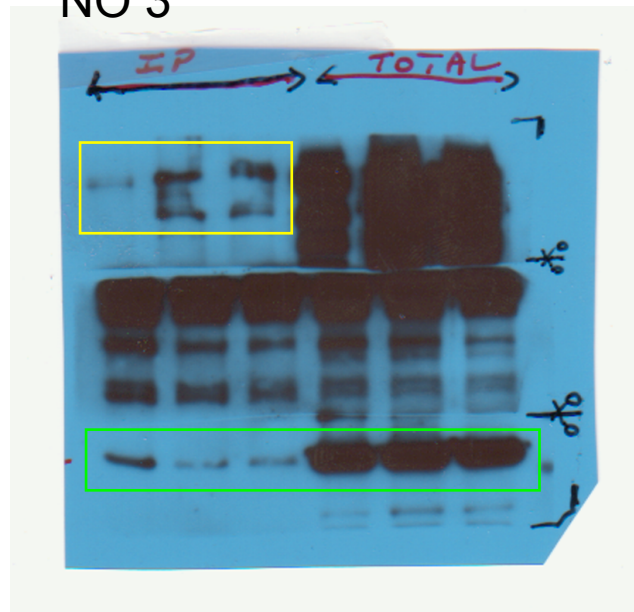

Editor requirement: Different exposures of a membrane transferred from a 12% acrylamide gel which was cut to generate three stripes: the first including bands around 72 Kda, the second including bands around 35Kda and the third in between.

By means of these separate stripes, we were able to immunodetect from the same gel: immunoprecipitation of FLAG-BECLIN 1; mito-BCL-2 and AMBRA1 co-immunoprecipitation and, the total extracts from each condition.

**Explanation of Figure 7 mounting:**

On figure 7e upper western-blot, we show "IP FLAG-BECLIN 1 and total extracts" from exposure NO1 (pink box), "mito-BCL-2 co-immunoprecipitated and total extracts" from exposure NO3 (green box), "AMBRA1 co-immunoprecipitated" from exposure NO3 and "total extracts" from exposure NO1 ( Yellow box).
