# Supplementary material
Source: PubMed Central journal article supplement (PMC3094111)
Supplement: emboj201149s3.pdf [file emboj201149s3.pdf]

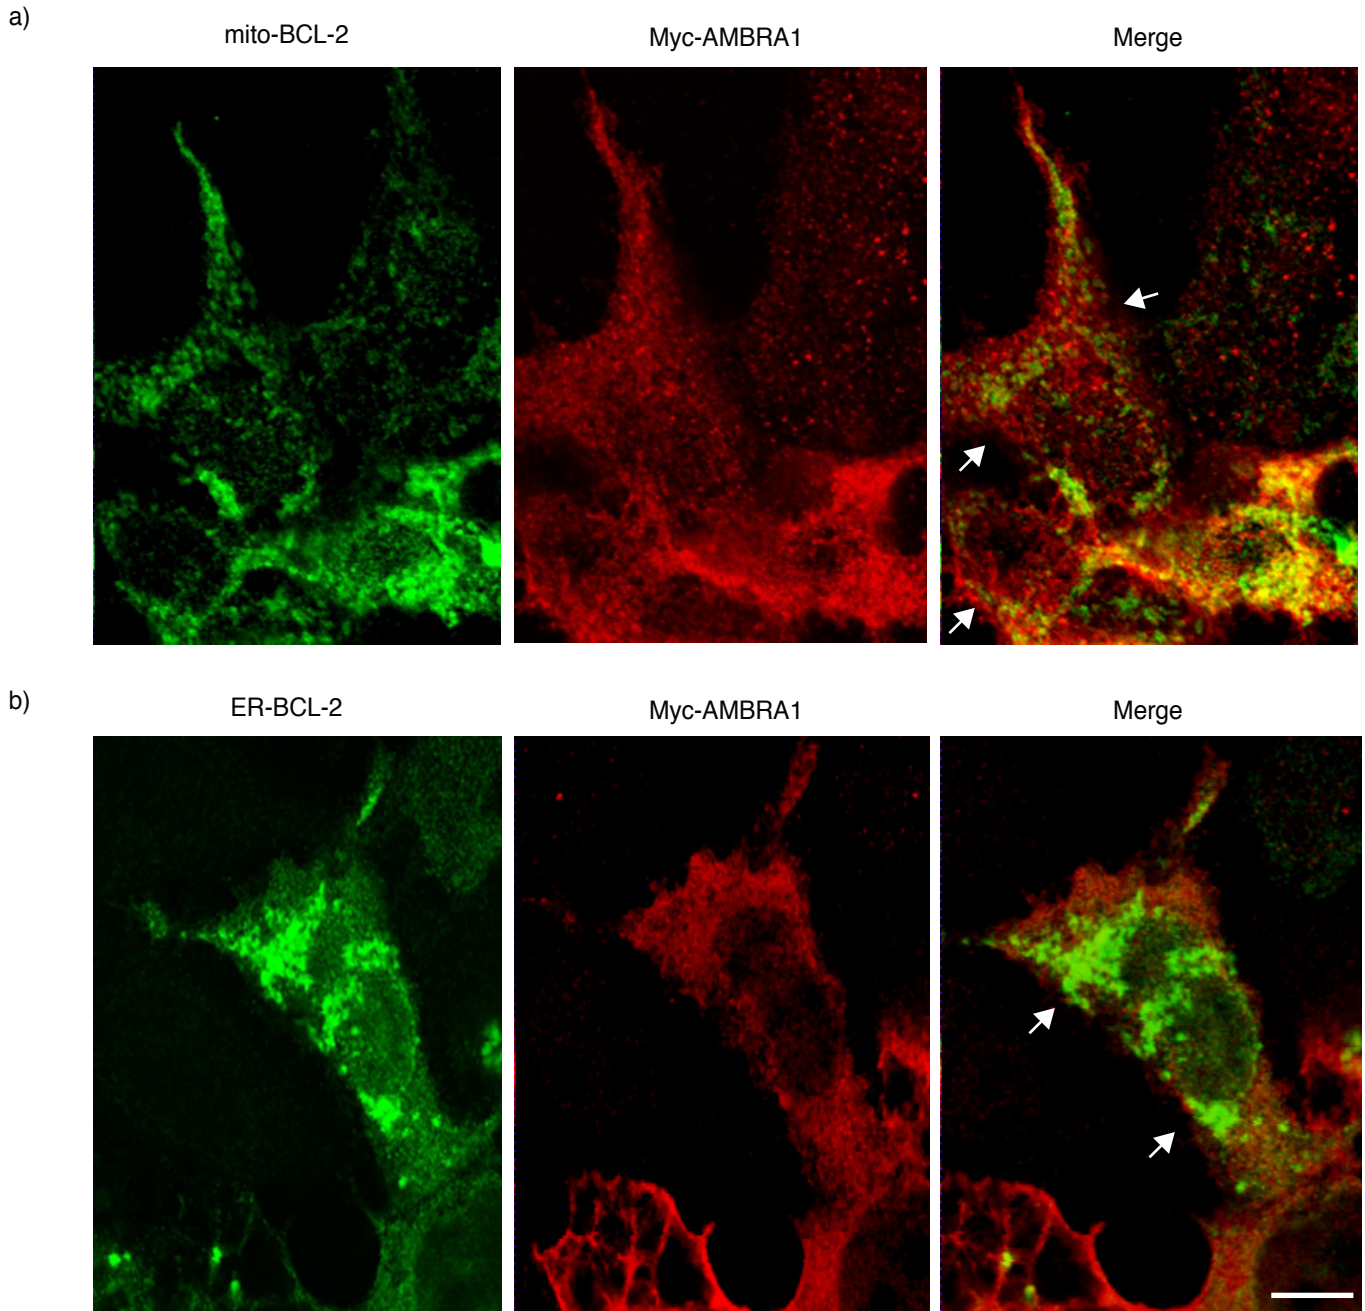

**FIGURE for Referee #3.** HEK293 cells were co-transfected with a vector encoding mito- or ER-BCL-2 (green staining) and with a vector encoding myc-AMBRA1 (red staining). The merge of the fluorescence images are illustrated. Arrows are pointing to examples of cells that display no co-localization between AMBRA1 and mito- BCL-2 (**a**) or ER-BCL-2 (**b**). Scal bar, 6  $\mu$ m.
